# Supplementary material for: Modulating the molecular packing and distribution enables fullerene-free ternary organic solar cells with high efficiency and long shelf-life
Source: Royal Society of Chemistry journal article supplement (doi:10.1039/c9ta07542a), 2019-01-01
Supplement: c9ta07542a1.pdf [file c9ta07542a1.pdf]

## Supporting Information

# Modulating the Molecular Packing and Distribution Enables Fullerene-free Ternary Organic Solar Cells with High Efficiency and Long Shelf-Life

Xiaoyang Du,<sup>a</sup> Juwen Zhao,<sup>a</sup> Hao Zhang,<sup>a</sup> Xi Lu,<sup>a</sup> Lei Zhou,<sup>a</sup> Zhenhua Chen,<sup>b</sup> Hui Lin,<sup>a\*</sup> Caijun Zheng,<sup>a</sup> Silu Tao<sup>a\*</sup>

<sup>a</sup> School of Optoelectronic Science and Engineering, University of Electronic Science and Technology of China (UESTC), Chengdu 610054, P. R. China

<sup>b</sup> Shanghai Synchrotron Facility (SSRF), Shanghai Advanced Research Institute, Chinese Academy of Sciences, Shanghai 201204, P. R. China

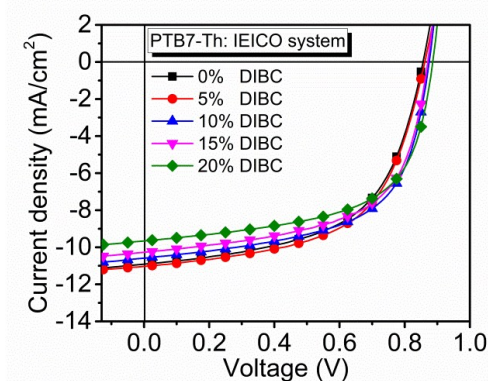

**Figure S1.** J-V properties of PTB7-Th:IEICO:DIBC containing devices with different DIBC content

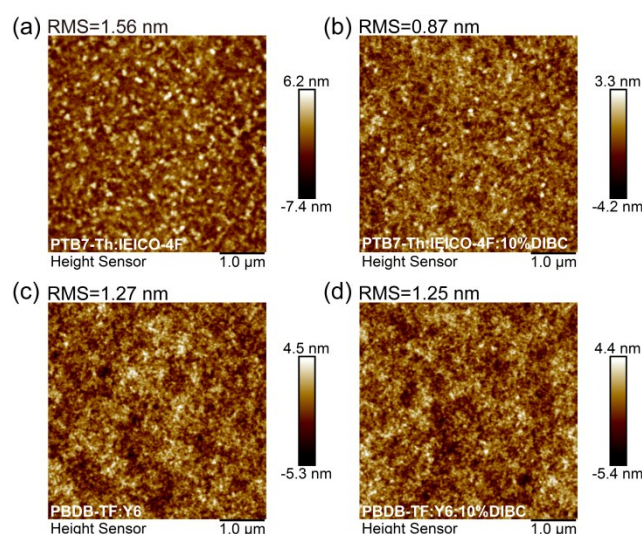

**Figure S2.** AFM images of (a) PTB7-Th: IEICO-4F, (b) PTB7-Th: IEICO-4F:10% DIBC, (c) PBDB-TF: Y6 and (d) PBDB-TF: Y6: 10% DIBC based films

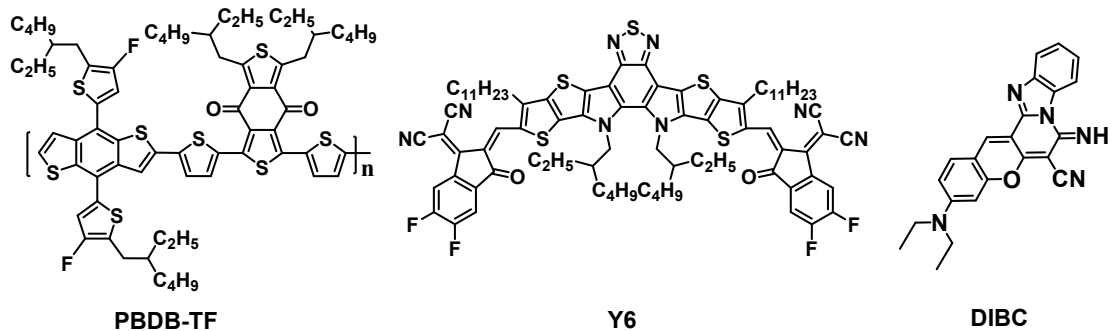

**Figure S3.** Molecular structures of PBDB-TF, Y6 and DIBC

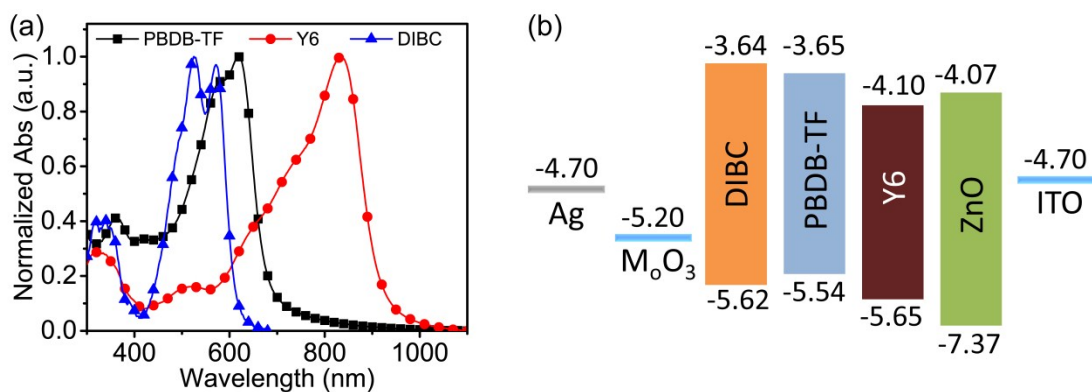

**Figure S4.** (a) Absorption spectra and (b) energy levels of PBDB-TF, Y6 and DIBC

**Table S1.** Performance summary of PTB7-Th: IEICO: DIBC containing devices with different DIBC content.

| DIBC content | $V_{oc}$ (V) | $J_{sc}$ (mA/cm <sup>2</sup> ) | FF (%) | $PCE_{max/avg}$ (%) <sup>a</sup> |
|--------------|--------------|--------------------------------|--------|----------------------------------|
| 0%           | 0.86         | 10.89                          | 57.00  | 5.31 (5.09)                      |
| 5%           | 0.86         | 11.00                          | 57.75  | 5.47 (5.29)                      |
| 10%          | 0.87         | 10.57                          | 59.90  | 5.54 (5.31)                      |
| 15%          | 0.87         | 10.26                          | 59.86  | 5.34 (5.26)                      |
| 20%          | 0.88         | 9.65                           | 60.34  | 5.16 (5.03)                      |

<sup>a</sup> Statistical data obtained from 5 devices.
